# Supplementary material
Source: Copernicus journal article supplement (doi:10.5194/bg-23-4321-2026)
Supplement: Supplementary file [file bg-23-4321-2026-supplement-title-page.pdf › bg-23-4321-2026-supplement-title-page.pdf]

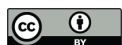

## *Supplement of*

# **Prediction of present and future spatial occurrence of cyanobacteria and the toxin nodularin in the Baltic Sea**

**Mohanad Abdelgadir et al.**

*Correspondence to:* Mohanad Abdelgadir ([mohanad.mohammed@slu.se](mailto:mohanad.mohammed@slu.se))

- [bg-23-4321-2026-supplement-title-page.pdf](#)
- [Supplementary Figures\\_2020-05-10\\_REVISED.pdf](#)
- [Supplementary Tables\\_2026-05-10\\_REVISED.pdf](#)

The copyright of individual parts of the supplement might differ from the article licence.
